# Supplementary material
Source: PubMed Central journal article supplement (PMC8970446)
Supplement: ASN.2021091262SupplementaryData.pdf [file ASN.2021091262SupplementaryData.pdf]

## Supplement

Table S1: Diagnostic codes

|                              |                                                                                                                                                                                                                                                                                                                                                                                             |
|------------------------------|---------------------------------------------------------------------------------------------------------------------------------------------------------------------------------------------------------------------------------------------------------------------------------------------------------------------------------------------------------------------------------------------|
| Diabetes                     | ICD-10 codes for diabetes with complication:<br>E102,E103,E104,E105,E107,E112,E113,E114,E115,E117, E122,E123,E124,E125,E127,E132,E133,E134,E135,E137, E142,E143,E144,E145,E147.<br>ICD-10 codes for diabetes without complication:<br>E100, E101, E106, E108, E109, E110, E111, E116, E118, E119, E120, E121, E126, E128, E129, E130, E131, E136, E138, E139, E140, E141, E146, E148, E149. |
| Cancer                       | ICD-10 codes for cancer:<br>C00 to C97                                                                                                                                                                                                                                                                                                                                                      |
| Cardiac disease              | ICD-10 codes I21, I22, I252 for Myocardial Infarction<br>Or<br>ICD-10 codes I43, I50, I099, I110, I130, I132, I255, I420, I425, I426, I427, I428, I429, P290 for Congestive Heart Failure                                                                                                                                                                                                   |
| Coronavirus-19<br>(COVID-19) | ICD-10 code for COVID-19, virus identified:<br>U071                                                                                                                                                                                                                                                                                                                                         |

Table S2: STROBE Statement – checklist of items that should be included in reports of observational studies

|                              | Item No. | STROBE items                                                                                                                                                                                                                                    | Location in manuscript where item is reported |
|------------------------------|----------|-------------------------------------------------------------------------------------------------------------------------------------------------------------------------------------------------------------------------------------------------|-----------------------------------------------|
| Title and abstract           |          |                                                                                                                                                                                                                                                 |                                               |
|                              | 1        | (a) Indicate the study’s design with Title and abstract 1 a commonly used term in the title or the abstract<br><br>(b) Provide in the abstract an informative and balanced summary of what was done and what was found                          | Title Page, page 1<br><br>Abstract, page 5    |
| Introduction                 |          |                                                                                                                                                                                                                                                 |                                               |
| Background/<br>rationale     | 2        | Explain the scientific background and rationale for the investigation being reported                                                                                                                                                            | Introduction, page 6                          |
| Objectives                   | 3        | State specific objectives, including any prespecified hypotheses                                                                                                                                                                                | Introduction, page 6                          |
| Methods                      |          |                                                                                                                                                                                                                                                 |                                               |
| Study design                 | 4        | Present key elements of study design early in the paper                                                                                                                                                                                         | Materials and Methods, page 7                 |
| Setting                      | 5        | Describe the setting, locations, and relevant dates, including periods of recruitment, exposure, follow-up, and data collection                                                                                                                 | Materials and Methods, page 7                 |
| Participants                 | 6        | (a) Cohort study—Give the eligibility criteria, and the sources and methods of selection of participants. Describe methods of follow-up<br><br>(b) Cohort study—For matched studies, give matching criteria and number of exposed and unexposed | Materials and Methods, page 7                 |
| Variables                    | 7        | Clearly define all outcomes, exposures, predictors, potential confounders, and effect modifiers. Give diagnostic criteria, if applicable                                                                                                        | Materials and Methods, page 8                 |
| Data sources/<br>measurement | 8        | For each variable of interest, give sources of data and details of methods of assessment (measurement). Describe comparability of                                                                                                               | Materials and Methods, page 8                 |

|                        |    |                                                                                                                                                                                                                                                                                                                                     |                                   |
|------------------------|----|-------------------------------------------------------------------------------------------------------------------------------------------------------------------------------------------------------------------------------------------------------------------------------------------------------------------------------------|-----------------------------------|
|                        |    | assessment methods if there is more than one group                                                                                                                                                                                                                                                                                  |                                   |
| Bias                   | 9  | Describe any efforts to address potential sources of bias                                                                                                                                                                                                                                                                           | Materials and Methods, page 9-10  |
| Study size             | 10 | Explain how the study size was arrived at                                                                                                                                                                                                                                                                                           | Materials and Methods, page 7     |
| Quantitative variables | 11 | Explain how quantitative variables were handled in the analyses. If applicable, describe which groupings were chosen and why                                                                                                                                                                                                        | Materials and Methods, page 8-9   |
| Statistical methods    | 12 | (a) Describe all statistical methods, including those used to control for confounding<br>(b) Describe any methods used to examine subgroups and interactions<br>(c) Explain how missing data were addressed<br>(d) Cohort study—If applicable, explain how loss to follow-up was addressed<br>(e) Describe any sensitivity analyses | Materials and Methods, page 10-12 |
| <b>Results</b>         |    |                                                                                                                                                                                                                                                                                                                                     |                                   |
| Participants           | 13 | (a) Report numbers of individuals at each stage of study—eg numbers potentially eligible, examined for eligibility, confirmed eligible, included in the study, completing follow-up, and analysed<br>(b) Give reasons for non-participation at each stage<br>(c) Consider use of a flow diagram                                     | Results, page 13                  |
| Descriptive data       | 14 | (a) Give characteristics of study participants (eg demographic, clinical, social) and information on exposures and potential confounders<br>(b) Indicate number of participants with missing data for each variable of interest<br>(c) Cohort study—Summarise follow-up time (eg, average and total amount)                         | Results, page 13                  |
| Outcome data           | 15 | Cohort study—Report numbers of outcome events or summary measures over time                                                                                                                                                                                                                                                         | Results, page 14-15               |

|                   |    |                                                                                                                                                                                                                                                                                                                                                                                                               |                        |
|-------------------|----|---------------------------------------------------------------------------------------------------------------------------------------------------------------------------------------------------------------------------------------------------------------------------------------------------------------------------------------------------------------------------------------------------------------|------------------------|
| Main results      | 16 | (a) Give unadjusted estimates and, if applicable, confounder-adjusted estimates and their precision (eg, 95% confidence interval). Make clear which confounders were adjusted for and why they were included<br>(b) Report category boundaries when continuous variables were categorized<br>(c) If relevant, consider translating estimates of relative risk into absolute risk for a meaningful time period | Results, page 14-15    |
| Other analyses    | 17 | Report other analyses done—eg analyses of subgroups and interactions, and sensitivity analyses                                                                                                                                                                                                                                                                                                                | Results, page 14-15    |
| Discussion        |    |                                                                                                                                                                                                                                                                                                                                                                                                               |                        |
| Key results       | 18 | Summarise key results with reference to study objectives                                                                                                                                                                                                                                                                                                                                                      | Discussion, page 15-16 |
| Limitations       | 19 | Discuss limitations of the study, taking into account sources of potential bias or imprecision. Discuss both direction and magnitude of any potential bias                                                                                                                                                                                                                                                    | Discussion, page 18-19 |
| Interpretation    | 20 | Give a cautious overall interpretation of results considering objectives, limitations, multiplicity of analyses, results from similar studies, and other relevant evidence                                                                                                                                                                                                                                    | Discussion, page 16-18 |
| Generalisability  | 21 | Discuss the generalisability (external validity) of the study results                                                                                                                                                                                                                                                                                                                                         | Discussion, page 18-19 |
| Other information |    |                                                                                                                                                                                                                                                                                                                                                                                                               |                        |
| Funding           | 22 | Give the source of funding and the role of the funders for the present study and, if applicable, for the original study on which the present article is based                                                                                                                                                                                                                                                 | Funding, page 22       |

Table S3: Non-COVID-19 related reasons for study exit by vaccine group in SARS-CoV-2 infection analysis

| Reason for study exit     | Unvaccinated | One Dose  | Two Doses | Adjusted HR (95% CI) |                    |
|---------------------------|--------------|-----------|-----------|----------------------|--------------------|
|                           |              |           |           | One Dose             | Two Doses          |
| Patients, N               | 2,403        | 1,203     | 10,153    |                      |                    |
| Non-COVID-19 death        | 490 (20%)    | 182 (15%) | 147 (1%)  | 0.70 (0.57 - 0.85)   | 0.36 (0.29 - 0.45) |
| Recovered kidney function | 154 (6%)     | 45 (4%)   | 30 (0.3%) | 0.48 (0.30 - 0.75)   | 0.28 (0.17 - 0.48) |
| Transfer out of province  | 11 (0.5%)    | 9 (1%)    | 7 (0.1%)  |                      |                    |
| Solid organ Transplant    | 108 (5%)     | 26 (2%)   | 43 (0.4%) | 0.98 (0.56 - 1.71)   | 1.36 (0.78 - 2.36) |
| Withdrawal from dialysis  | 136 (6%)     | 53 (4%)   | 52 (1%)   |                      |                    |

Non-COVID-19 death and withdrawal from dialysis events were aggregated to conduct the competing risk analysis for non-COVID-19 death.

Lost to follow-up and transfer out of province events were censored in the competing risk analyses due to very low proportions within group.

Table S4: Adjusted Hazard Ratios (HRs) for risk factors for SARS-CoV-2 infection including two doses of vaccine

|                                        | Estimate | HR (95% CI)      | P-value |
|----------------------------------------|----------|------------------|---------|
| Vaccination status (Ref. Unvaccinated) |          |                  |         |
| Unvaccinated                           |          | Reference        |         |
| ≥14 days post dose 1                   | -0.52    | 0.59 (0.46,0.76) | <0.001  |
| ≥7 days post dose 2                    | -1.18    | 0.31 (0.22,0.42) | <0.001  |
| Sex                                    |          |                  |         |
| Female                                 |          | Reference        |         |
| Male                                   | -0.13    | 0.88 (0.75,1.03) | 0.11    |
| Age, yr                                |          |                  |         |
| 18-39                                  |          | Reference        |         |
| 40-69                                  | 0.05     | 1.05 (0.75,1.47) | 0.77    |
| 70+                                    | -0.24    | 0.78 (0.55,1.11) | 0.17    |
| Ethnicity                              |          |                  |         |
| Caucasian                              |          | Reference        |         |
| Asian/Oriental                         | 0.03     | 1.03 (0.75,1.40) | 0.86    |
| Black                                  | 0.43     | 1.53 (1.18,1.98) | <0.001  |
| Indian Sub-Continent                   | 0.24     | 1.27 (0.99,1.64) | 0.06    |
| Other, Non-Caucasian                   | 0.52     | 1.69 (1.36,2.08) | <0.001  |
| Unknown/Not Given                      | -0.05    | 0.96 (0.63,1.46) | 0.83    |
| Modality                               |          |                  |         |
| In-home                                |          | Reference        |         |
| In-Centre hemodialysis                 | 0.57     | 1.77(1.42,2.21)  | <0.001  |
| Charlson Comorbidity Index             | 0.06     | 1.07(1.03,1.11)  | <0.001  |
| Long-term care residence               |          |                  |         |
| No                                     |          | Reference        |         |
| Yes                                    | 0.84     | 2.31 (1.70,3.16) | <0.001  |
| Vintage                                |          |                  |         |
| 3 years or less                        |          | Reference        |         |
| >3 years                               | -0.24    | 0.79 (0.67,0.93) | <0.001  |
| Number of tests in previous 12 months  |          |                  |         |
| One or less                            | -0.02    | 0.98 (0.77,1.24) | 0.87    |
| Two                                    | 0.43     | 1.54 (1.28,1.86) | <0.001  |

|                     |       |                  |        |
|---------------------|-------|------------------|--------|
| Three or greater    |       | Reference        |        |
| Economic Dependency |       |                  |        |
| 1                   |       | Reference        |        |
| 2                   | -0.10 | 0.90 (0.70,1.16) | 0.43   |
| 3                   | -0.07 | 0.94 (0.73,1.21) | 0.61   |
| 4                   | 0.05  | 1.05 (0.83,1.34) | 0.67   |
| 5 (highest)         | 0.11  | 1.12 (0.88,1.42) | 0.38   |
| Average Cases rate  | 0.06  | 1.06 (1.05,1.07) | <0.001 |
